# Supplementary material for: Vanishing white matter: deregulated integrated stress response as therapy target
Source: PubMed Central journal article supplement — Ann Clin Transl Neurol. 2019 Jul 18;6(8):1407–22. doi: 10.1002/acn3.50826 (PMC6689685; doi:10.1002/acn3.50826), 2019-07-18
Supplement: ACN3-6-1407-s003.pdf [file ACN3-6-1407-s003.pdf]

|     | Probe on microarray chip | Gene          | Transcript | FDR           | logFC | Regulated by ATF4 <sup>1</sup> |
|-----|--------------------------|---------------|------------|---------------|-------|--------------------------------|
| 1.  | A_52_P532982             | Gdf15         | NM_011819  | 0,00000006130 | 4.42  | -                              |
| 2.  | A_51_P331570             | Trib3         | NM_175093  | 0,00042700000 | 3.61  | +                              |
| 3.  | A_51_P519251             | Nupr1         | NM_019738  | 0,00074300000 | 2.87  | +                              |
| 4.  | A_51_P453475             | Slc1a5        | NM_009201  | 0,00284000000 | 2.62  | +                              |
| 5.  | A_51_P269216             | Atf5          | NM_030693  | 0,00126000000 | 2.53  | +                              |
| 6.  | A_52_P374960             | Ostn          | NM_198112  | 0,00699000000 | 2.40  | +                              |
| 7.  | A_51_P263965             | Hmox1         | NM_010442  | 0,00003840000 | 2.36  | +                              |
| 8.  | A_51_P129502             | Slc7a11       | NM_011990  | 0,03910000000 | 2.22  | +                              |
| 9.  | A_51_P283473             | Fibin         | NM_026271  | 0,00267000000 | 2.12  | +                              |
| 10. | A_51_P493987             | Moxd1         | NM_021509  | 0,00039900000 | 2.03  | +                              |
| 11. | A_51_P421140             | Tubb6         | NM_026473  | 0,00017300000 | 1.98  | -                              |
| 12. | A_51_P273639             | Slc7a5        | NM_011404  | 0,00000975000 | 1.84  | +                              |
| 13. | A_52_P245648             | Slc3a2        | NM_008577  | 0,03910000000 | 1.56  | +                              |
| 14. | A_51_P275016             | Slc7a3        | NM_007515  | 0,02640000000 | 1.56  | +                              |
| 15. | A_51_P268697             | Slc1a3        | NM_148938  | 0,02300000000 | 1.55  | -                              |
| 16. | A_52_P533146             | Ddit3         | NM_007837  | 0,00261000000 | 1.51  | +                              |
| 17. | A_52_P21659              | Pck2          | NM_028994  | 0,02640000000 | 1.45  | +                              |
| 18. | A_51_P319460             | Osmr          | NM_011019  | 0,03750000000 | 1.32  | + <sup>2</sup>                 |
| 19. | A_51_P489153             | Crot          | NM_023733  | 0,01770000000 | 1.28  | -                              |
| 20. | A_51_P427674             | Cpt1a         | NM_013495  | 0,02640000000 | 1.19  | -                              |
| 21. | A_51_P317427             | Psat1         | NM_177420  | 0,01770000000 | 1.17  | +                              |
| 22. | A_51_P427674             | Cpt1a         | NM_013495  | 0,03410000000 | 1.05  | -                              |
| 23. | A_51_P136303             | Cyp4f15       | NM_134127  | 0,02640000000 | 0.88  | -                              |
| 24. | A_52_P57013              | Nxn           | NM_008750  | 0,04240000000 | -0.85 | -                              |
| 25. | A_51_P436269             | Grin2c        | NM_010350  | 0,00892000000 | -1.14 | -                              |
| 26. | A_51_P209327             | Apln          | NM_013912  | 0,02640000000 | -1.18 | +                              |
| 27. | A_52_P266686             | Ntsr2         | NM_008747  | 0,04560000000 | -1.29 | -                              |
| 28. | A_51_P362066             | Chi3l1        | NM_007695  | 0,02850000000 | -1.43 | -                              |
| 29. | A_52_P467930             | BC158068      | BC158068   | 0,02810000000 | -1.47 | -                              |
| 30. | A_51_P194099             | Thrsp         | NM_009381  | 0,02640000000 | -1.47 | -                              |
| 31. | A_51_P456465             | Cldn10        | NM_021386  | 0,00393000000 | -1.57 | -                              |
| 32. | A_51_P244540             | Ntsr2         | NM_008747  | 0,00041900000 | -1.72 | -                              |
| 33. | A_51_P443819             | 2610034M16Rik | NM_027001  | 0,02980000000 | -1.91 | -                              |

<sup>1</sup>) reported in Han et al. 2013

<sup>2</sup>) downregulation by ATF4 reported (Han et al. 2013)

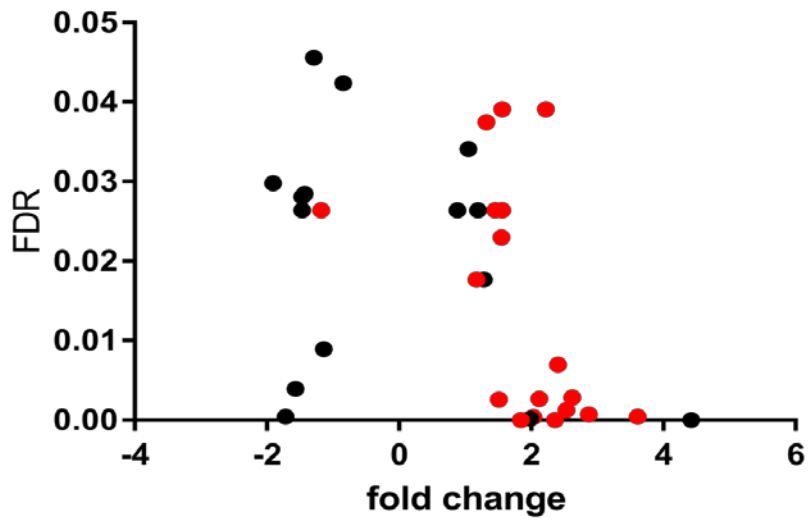

Visualization of the 33 probes representing eIF2BεArg191His–regulated shifts in mouse forebrain polysome association. All data points have a false discovery rate (FDR) < 0.05 and are considered significantly different from WT mouse brain. The fold change (FC)  $\Delta(\Delta(B2b5ho,A2b5ho))$  is plotted, with B indicating abundance in polysomes and A indicating abundance in monosomes (signals obtained from normalized microarray data). Red dots indicate ATF4-regulated mRNAs.
