# Supplementary material for: Vanishing white matter: deregulated integrated stress response as therapy target
Source: PubMed Central journal article supplement — Ann Clin Transl Neurol. 2019 Jul 18;6(8):1407–22. doi: 10.1002/acn3.50826 (PMC6689685; doi:10.1002/acn3.50826), 2019-07-18
Supplement: ACN3-6-1407-s008.pdf [file ACN3-6-1407-s008.pdf]

**Supplementary File 7. Raw data for Figure 1b: Cp values for Akt in 5 independent qPCR plates**

| plate 1   | reference for Slc1a5 and Psat | plate 2 for Eif4ebp1 | plate 3 for Trib3 | plate 4 for Ddit3 | plate 5 for Slc3a2 |
|-----------|-------------------------------|----------------------|-------------------|-------------------|--------------------|
|           | Mean Cp*                      | Mean Cp*             | Mean Cp*          | Mean Cp*          | Mean Cp*           |
| wt A 16   | 24,03                         | 23,88                | 22,98             | 23,01             | 23,11              |
| wt B1 16  | 24,02                         | 23,84                | 23,23             | 23,11             | 23,36              |
| wt B2 16  | 24,53                         | 24,22                | 23,81             | 23,81             | 23,92              |
| wt A 17   | 23,99                         | 23,81                | 23,24             | 23,26             | 23,47              |
| wt B1 17  | 24,09                         | 23,99                | 23,39             | 23,46             | 23,50              |
| wt B2 17  | 24,49                         | 24,14                | 23,95             | 24,05             | 23,98              |
| wt A 21   | 23,92                         | 23,80                | 23,02             | 23,08             | 23,14              |
| wt B1 21  | 23,78                         | 23,74                | 22,84             | 22,70             | 22,84              |
| wt B2 21  | 25,16                         | 25,05                | 24,32             | 24,20             | 24,36              |
| 2b5 A 16  | 23,97                         | 24,03                | 23,35             | 23,30             | 23,36              |
| 2b5 B1 16 | 24,20                         | 24,38                | 22,70             | 22,57             | 22,64              |
| 2b5 B2 16 | 24,31                         | 24,22                | 24,05             | 24,00             | 24,15              |
| 2b5 A 17  | 24,18                         | 24,29                | 23,66             | 23,56             | 23,66              |
| 2b5 B1 17 | 23,26                         | 23,44                | 23,19             | 22,97             | 23,19              |
| 2b5 B2 17 | 24,33                         | 24,55                | 24,37             | 24,05             | 24,12              |
| 2b5 A 21  | 23,44                         | 23,53                | 23,00             | 22,95             | 22,97              |
| 2b5 B1 21 | 24,05                         | 24,20                | 23,22             | 23,22             | 23,28              |
| 2b5 B2 21 | 24,68                         | 24,93                | 24,17             | 24,14             | 24,19              |

\*each mean CP represents mean signal from two wells in the same plate

*mean per plate*

| wt A  | wt B1 | wt B2 | 2b5 A | 2b5 B1 | 2b5 B2 |
|-------|-------|-------|-------|--------|--------|
| 23,98 | 23,96 | 24,73 | 23,86 | 23,84  | 24,44  |
| 23,83 | 23,85 | 24,47 | 23,95 | 24,01  | 24,57  |
| 23,08 | 23,15 | 24,03 | 23,34 | 23,03  | 24,19  |
| 23,12 | 23,09 | 24,02 | 23,27 | 22,92  | 24,06  |
| 23,24 | 23,23 | 24,08 | 23,33 | 23,04  | 24,16  |

*SD per plate (variation between samples from different animals)*

| wt A | wt B1 | wt B2 | 2b5 A | 2b5 B1 | 2b5 B2 |
|------|-------|-------|-------|--------|--------|
| 0,06 | 0,16  | 0,38  | 0,38  | 0,51   | 0,21   |
| 0,05 | 0,13  | 0,50  | 0,39  | 0,50   | 0,35   |
| 0,14 | 0,28  | 0,26  | 0,33  | 0,29   | 0,16   |
| 0,13 | 0,38  | 0,19  | 0,31  | 0,33   | 0,07   |
| 0,20 | 0,35  | 0,24  | 0,35  | 0,35   | 0,03   |

**Akt Cp values figure 1b**

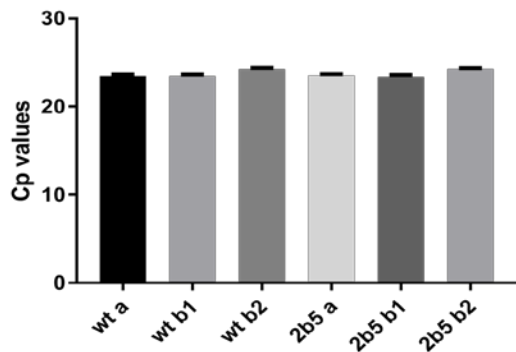

**Conclusion**

No differences in Akt mRNA abundance between WT and 2b5ho gradient fractions
